# Supplementary material for: Simultaneous Improvement in the Thermostability and Catalytic Activity of Epoxidase Lsd18 for the Synthesis of Lasalocid A
Source: MDPI journal article supplement (doi:10.3390/ijms242316795), 2023-11-27
Supplement: s1 [file s1]

# Simultaneous improvement in the thermostability and catalytic activity of epoxidase Lsd18 for the synthesis of Lasalocid A

Ning Liu <sup>1,†</sup>, Hongli Xiao <sup>1,†</sup>, Yongjian Zang <sup>2,3</sup>, Longji Zhou <sup>4</sup>, Jun Mencius <sup>4</sup>, Zhiwei Yang <sup>2</sup>, Shu Quan <sup>4,\*</sup> and Xi Chen <sup>1,\*</sup>

<sup>1</sup> Key Laboratory of Synthetic and Natural Functional Molecule of the Ministry of Education, College of Chemistry and Materials Science, Northwest University, Xi'an 710127, China

<sup>2</sup> MOE Key Laboratory for Nonequilibrium Synthesis and Modulation of Condensed Matter, School of Physics, Xi'an Jiaotong University, Xi'an 710049, China

<sup>3</sup> Institute of Physics and Electronic Information, Yunnan Normal University, Kunming 650504, China

<sup>4</sup> State Key Laboratory of Bioreactor Engineering, East China University of Science and Technology, Shanghai 200237, China

\* Correspondence: shuquan@ecust.edu.cn (S.Q.); xchen@nwu.edu.cn (X.C.)

<sup>†</sup> These authors contributed equally to this work.

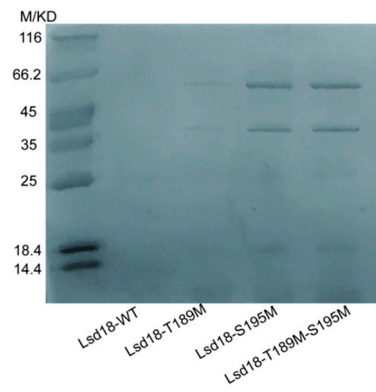

**Figure S1.** SDS-PAGE of the limited proteolysis of Lsd18 with trypsin.

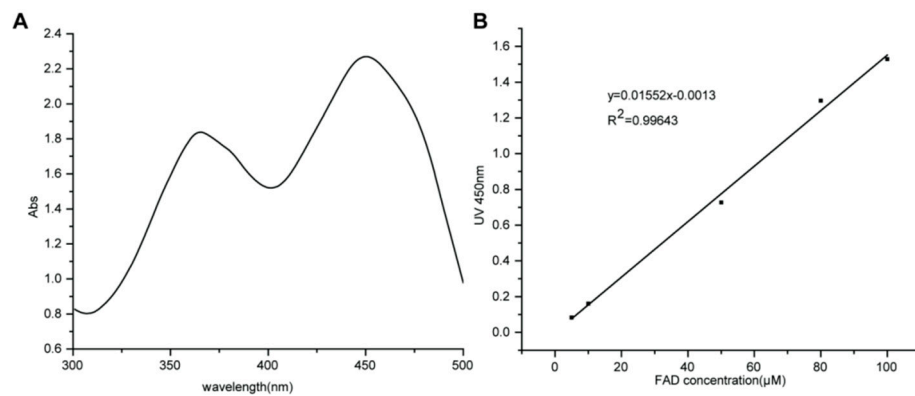

**Figure S2.** Standard FAD fluorescence spectrum (A) and standard curve of the UV absorbance and the concentration of FAD (B).

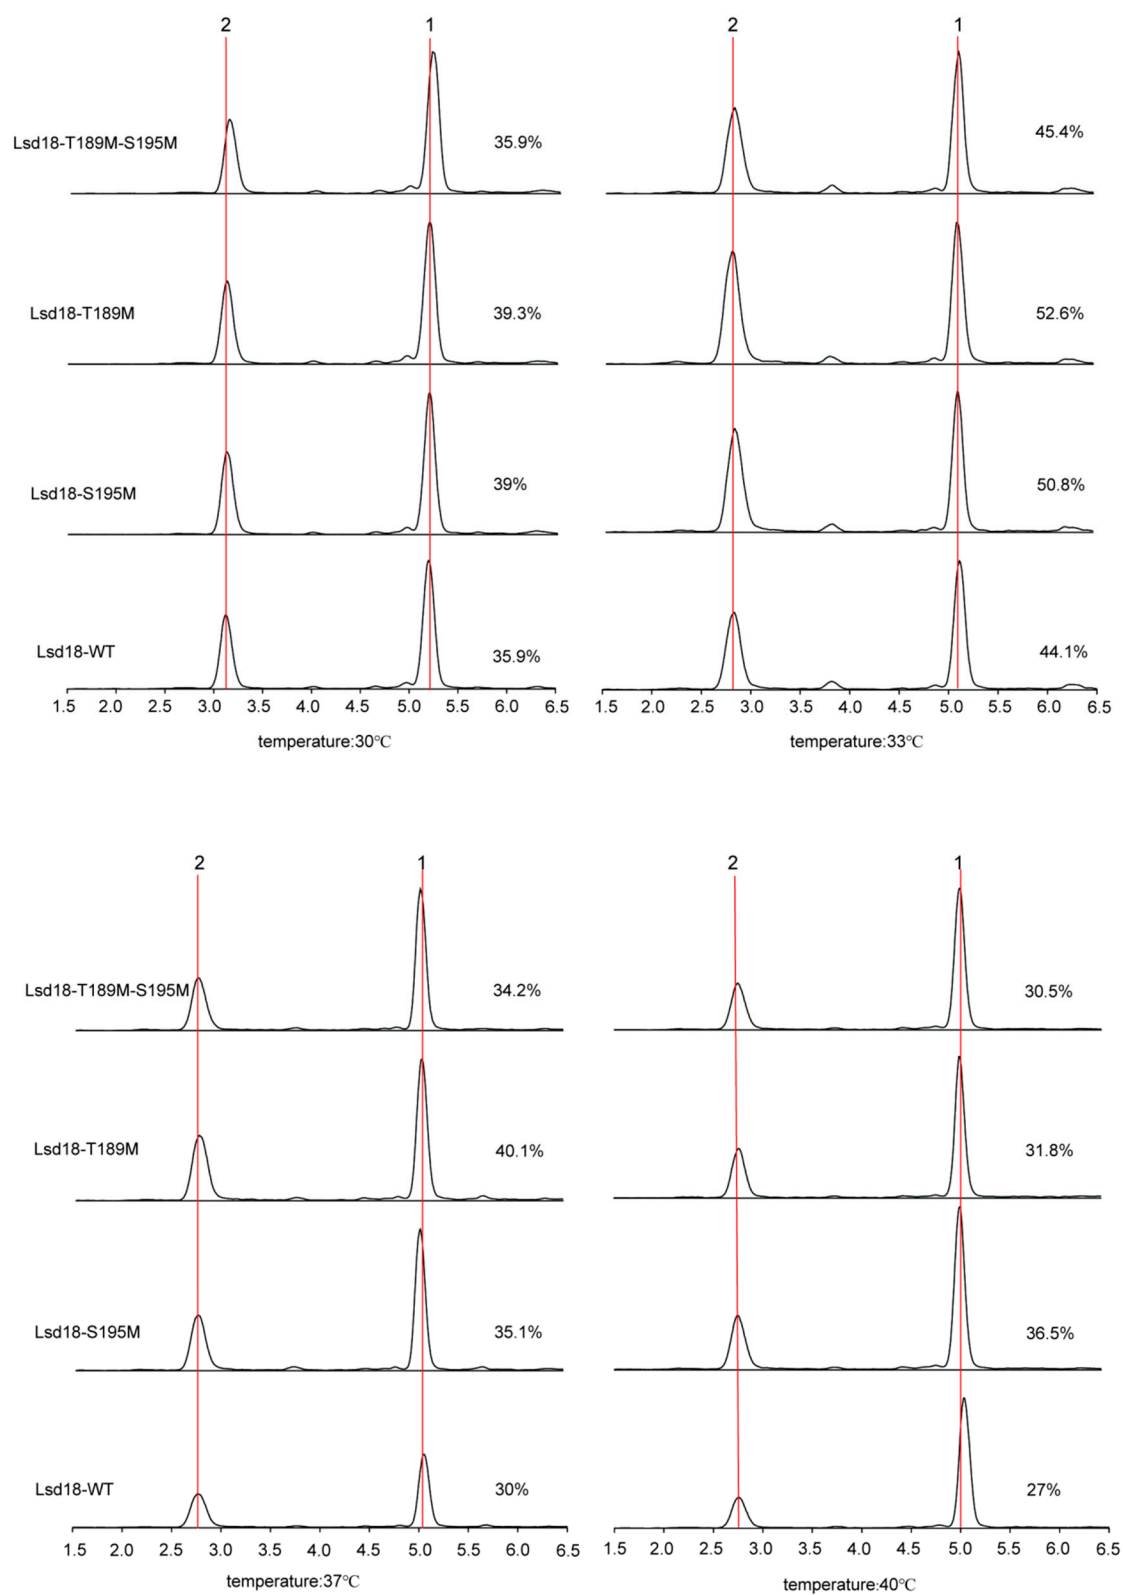

**Figure S3.** LC-MS detection of the enzymatic activity of wild-type Lsd18 and the mutants at different temperatures.

**Table S1.** Semi-rational design mutants of Lsd18

| Mutant | $\Delta\Delta G$ (kcal/mol) |
|--------|-----------------------------|
| R51W   | -0.69                       |
| D52S   | -0.40                       |
| V64D   | -1.12                       |
| S108V  | -1.79                       |
| S237V  | -2.31                       |
| H239L  | -1.14                       |

**Table S2.** Data collection and refinement statistics

|                                     | Lsd18-S195M               | Lsd18-T189M-S195M           |
|-------------------------------------|---------------------------|-----------------------------|
| PDB                                 | 8WVB                      | 8WVF                        |
| <b>Data collection</b>              |                           |                             |
| Space group                         | P 1 21 1                  | P 1 21 1                    |
| Cell dimensions                     |                           |                             |
| $a, b, c$ (Å)                       | 62.041, 48.671, 136.049   | 63.005, 48.116, 135.569     |
| $\alpha, \beta, \gamma$ (°)         | 90, 91.337, 90            | 90, 91.559, 90              |
| Resolution (Å)                      | 29.46 - 2.5 (2.589 - 2.5) | 19.9- 3.764 (3.897 - 3.764) |
| $R_{\text{merge}}$                  | 0.370 (0.994)             | 0.268 (0.389)               |
| $I / \sigma I$                      | 3.9 (2.6)                 | 3.7 (2.2)                   |
| Completeness (%)                    | 99.03 (98.52)             | 87.95 (83.62)               |
| Redundancy                          | 6.7 (6.8)                 | 1.0 (1.0)                   |
| <b>Refinement</b>                   |                           |                             |
| Resolution (Å)                      | 2.5                       | 3.764                       |
| No. reflections                     | 28322                     | 7506                        |
| $R_{\text{work}} / R_{\text{free}}$ | 0.1955/0.2538             | 0.2323 /0.3194              |
| No. atoms                           | 7084                      | 6623                        |
| Protein                             | 930                       | 936                         |
| Ligand/ion                          | 108                       | 106                         |
| Solvent                             | 186                       | 0                           |
| $B$ -factors                        | 22.42                     | 33.26                       |
| Protein                             | 22.54                     | 33.26                       |
| Ligand/ion                          | 16.94                     | 33.27                       |
| Solvent                             | 21.17                     | 1                           |
| R.m.s. deviations                   |                           |                             |
| Bond lengths (Å)                    | 0.003                     | 0.002                       |
| Bond angles (°)                     | 0.57                      | 0.58                        |
